# Supplementary material for: G protein-coupled receptor 183 facilitates endothelial-to-hematopoietic transition via Notch1 inhibition
Source: PubMed Central journal article supplement — Cell Res. 2015 Sep 11;25(10):1093–107. doi: 10.1038/cr.2015.109 (PMC4650626; doi:10.1038/cr.2015.109), 2015-09-11
Supplement: cr2015109x1.pdf [file cr2015109x1.pdf]

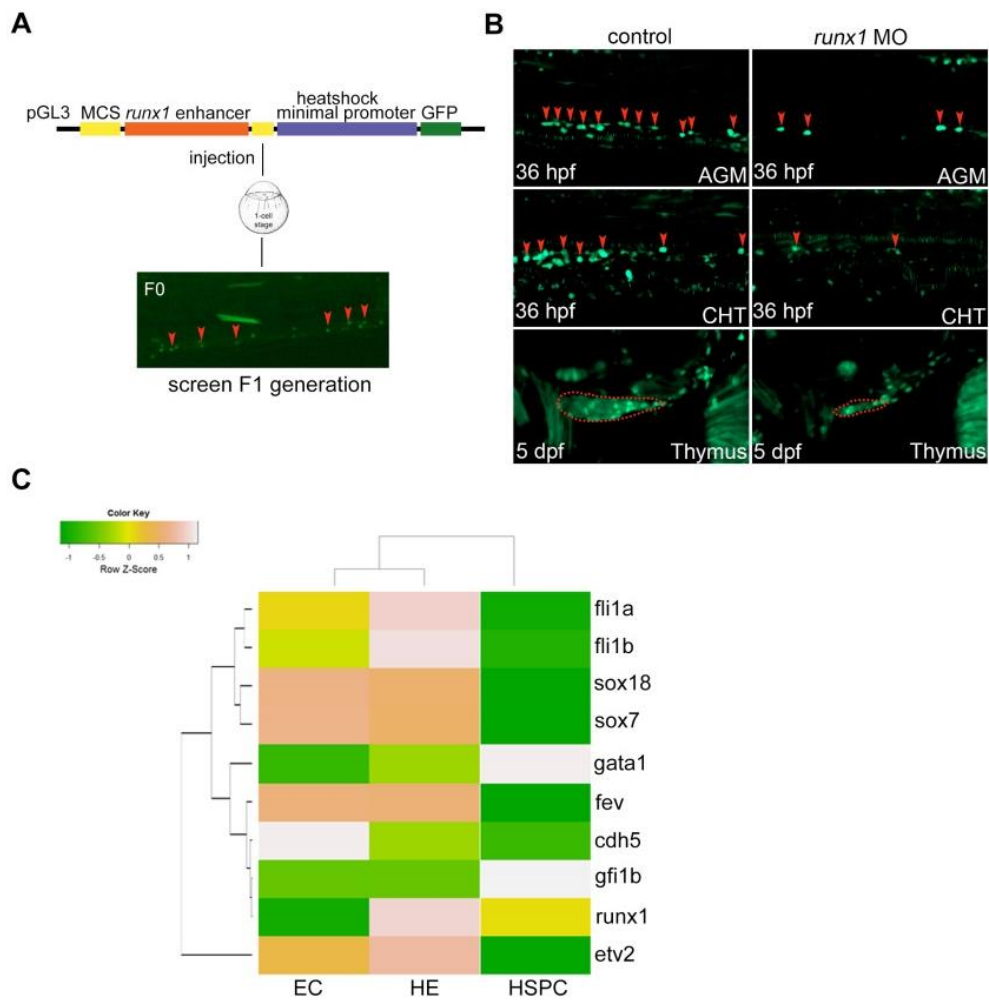

**Supplementary information, Figure S1** *Tg(runx1:en-GFP)* can recapitulate *runx1* endogenous expression in vivo. (A) Scheme of generation of the stable transgenic fish line. (B) GFP signals in *Tg(runx1:en-GFP)* embryos decreased after injecting *runx1* MO. Red arrowheads denote the GFP<sup>+</sup> cells, and red dashed cycles mark the thymus region. (C) Heatmap analysis of the known genes involved in hematopoietic or vascular development.
