# Supplementary material for: G protein-coupled receptor 183 facilitates endothelial-to-hematopoietic transition via Notch1 inhibition
Source: PubMed Central journal article supplement — Cell Res. 2015 Sep 11;25(10):1093–107. doi: 10.1038/cr.2015.109 (PMC4650626; doi:10.1038/cr.2015.109), 2015-09-11
Supplement: cr2015109x2.pdf [file cr2015109x2.pdf]

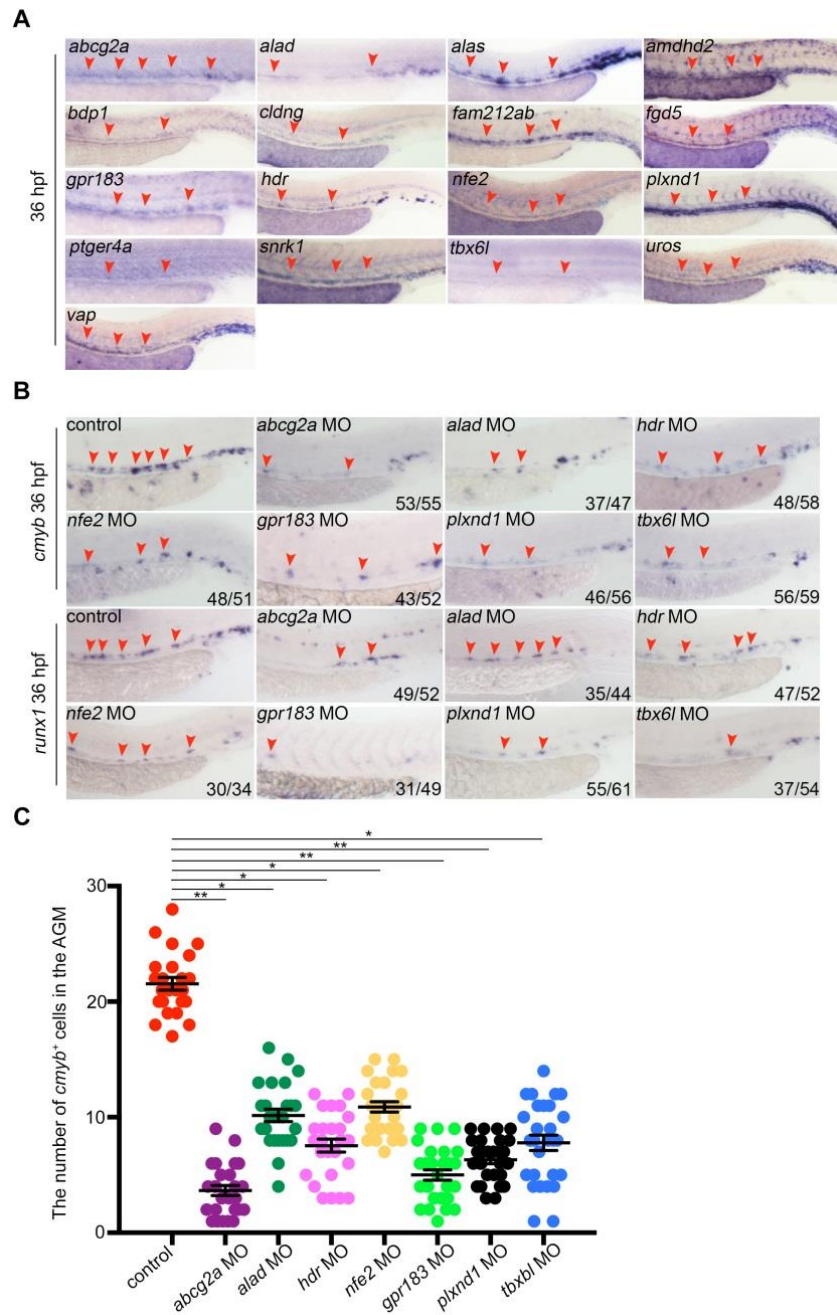

**Supplementary information, Figure S2** Expression profile and loss-of-function assay identify genes essential for definitive hematopoiesis. (A) Expression pattern of the 17 genes at 36 hpf by whole-mount in situ hybridization (WISH). Red arrowheads denote the staining signals in the AGM region. (B, C) Decreased *runx1/cmyb* expression in 7 different morphants at 36 hpf, and the dot-blot quantification analysis. Red arrowheads mark *runx1/cmyb* expression in the AGM region. Error bar,  $\pm$ s. d. \* $p < 0.05$ , \*\* $p < 0.01$ .
