# Supplementary material for: G protein-coupled receptor 183 facilitates endothelial-to-hematopoietic transition via Notch1 inhibition
Source: PubMed Central journal article supplement — Cell Res. 2015 Sep 11;25(10):1093–107. doi: 10.1038/cr.2015.109 (PMC4650626; doi:10.1038/cr.2015.109), 2015-09-11
Supplement: cr2015109x3.pdf [file cr2015109x3.pdf]

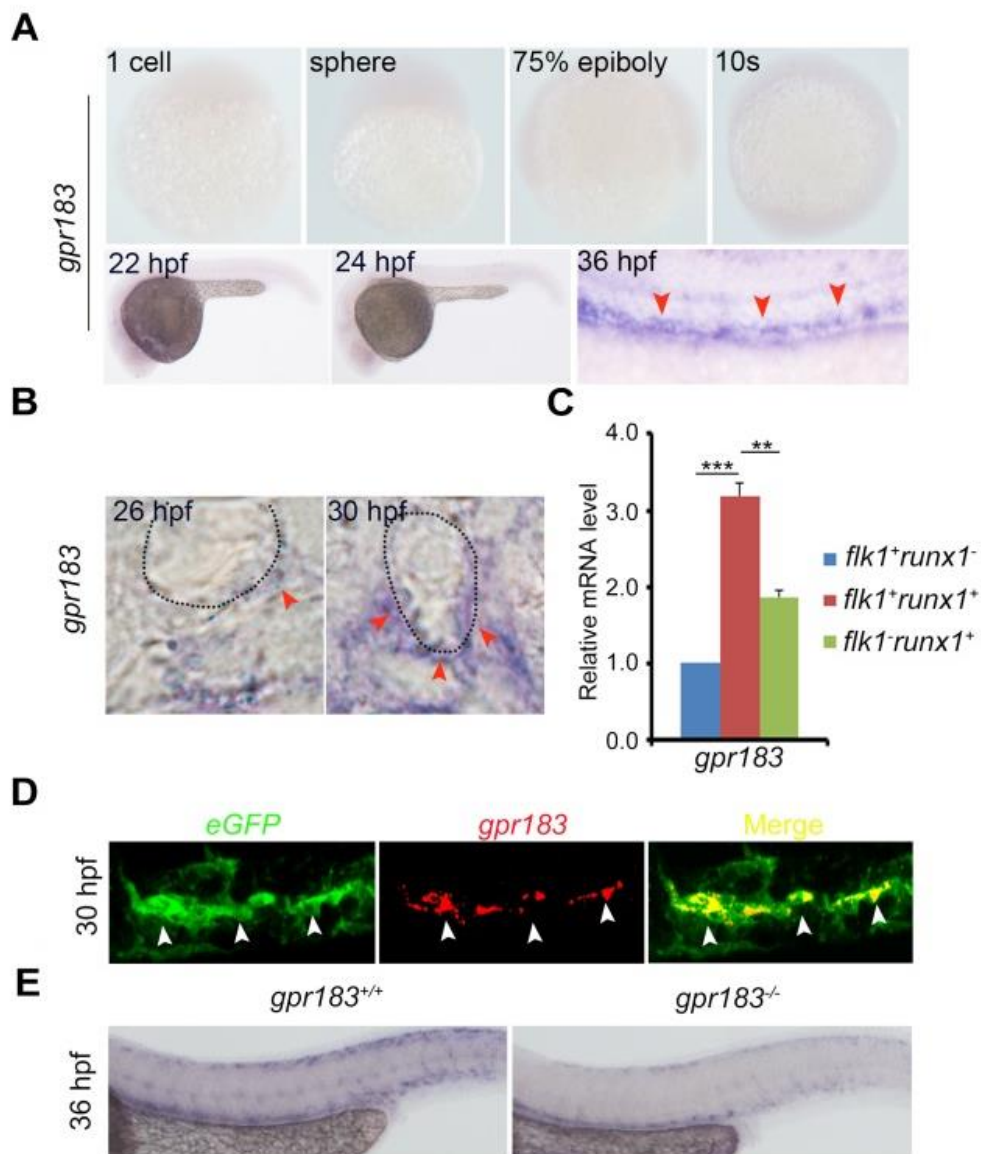

**Supplementary information, Figure S3** *gpr183* is expressed in the hemogenic endothelium (HE) after 24 hpf, and is essential for adult hematopoiesis in zebrafish. (A) Time-course expression of *gpr183* ranging from one-cell stage to 36 hpf shows that *gpr183* is not expressed before 24 hpf. (B) Frozen sections of the embryos after WISH show that *gpr183* is expressed in the AGM at about 26 hpf. (C) *gpr183* expression in sorted ECs, HEs and HSPCs at 28 hpf by qPCR. Error bar,  $\pm$ s. d. \* $p < 0.05$ , \*\*\* $p < 0.001$ . (D) *gpr183* expression using double fluorescence in situ hybridization (dFISH) in 30 hpf Tg(*fli1a*:eGFP) embryo. (E) *gpr183* is not expressed in *gpr183<sup>-/-</sup>* embryos.
