# Supplementary material for: G protein-coupled receptor 183 facilitates endothelial-to-hematopoietic transition via Notch1 inhibition
Source: PubMed Central journal article supplement — Cell Res. 2015 Sep 11;25(10):1093–107. doi: 10.1038/cr.2015.109 (PMC4650626; doi:10.1038/cr.2015.109), 2015-09-11
Supplement: cr2015109x5.pdf [file cr2015109x5.pdf]

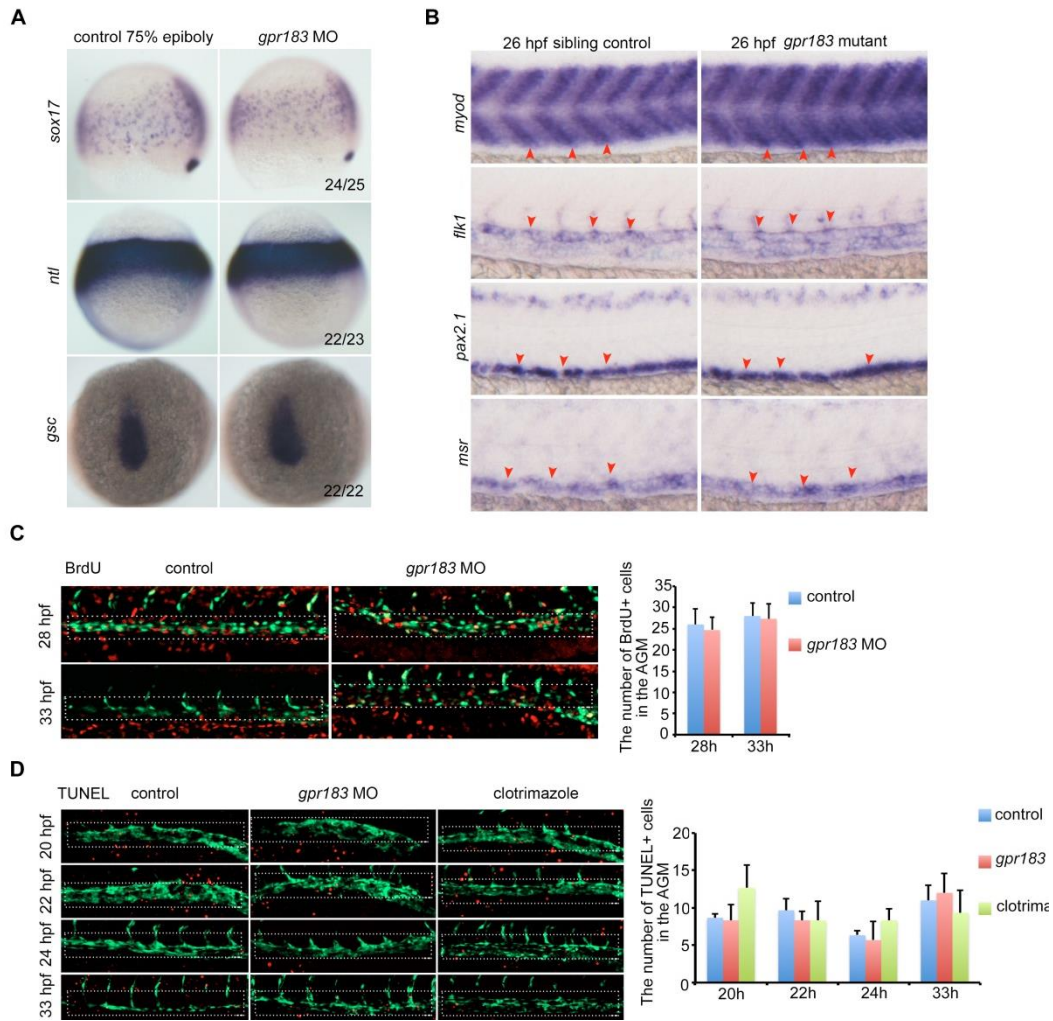

**Supplementary information, Figure S5** Gpr183 regulates HE/HSC development specifically. (A) The expression of mesoderm markers *sox17*, *ntl* and ectoderm marker *gsc* do not altered in *gpr183* morphants at 75% epiboly. (B) The expression of niche cells markers, including somite marker *myod*, endothelial cell marker *flk1*, pronephric duct marker *pax2.1* and venous marker *msr*, do not altered in *gpr183* mutants. (C) BrdU assay in Tg(*fli1a*:eGFP) embryos after knocking down *gpr183* (n=8 for each). (D) Time-course TUNEL assay in Tg(*fli1a*:eGFP) embryos after blocking *gpr183* signaling (n=6 for each). White rectangles mark the proliferative or apoptotic cells in the AGM.
