# Supplementary material for: G protein-coupled receptor 183 facilitates endothelial-to-hematopoietic transition via Notch1 inhibition
Source: PubMed Central journal article supplement — Cell Res. 2015 Sep 11;25(10):1093–107. doi: 10.1038/cr.2015.109 (PMC4650626; doi:10.1038/cr.2015.109), 2015-09-11
Supplement: cr2015109x6.pdf [file cr2015109x6.pdf]

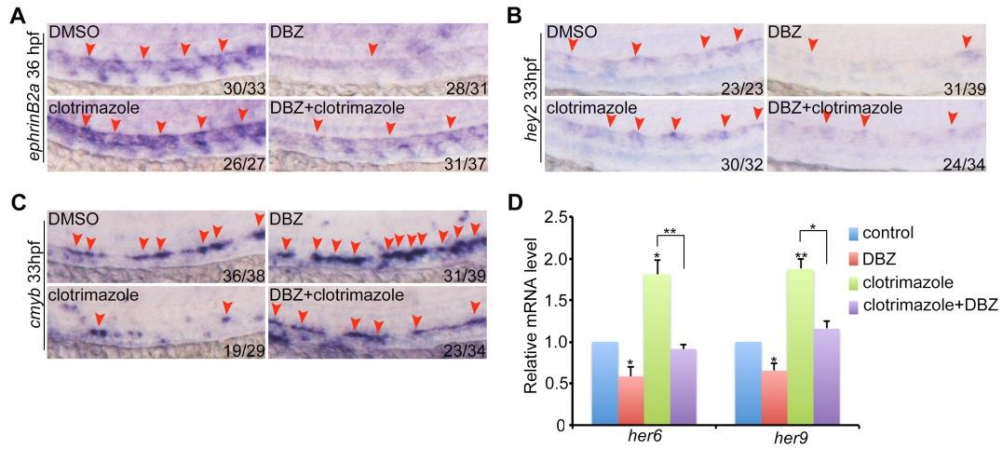

**Supplementary information, Figure S6** Notch signaling functions downstream of Gpr183. (A-C) The expression of *ephrinB2a*, *hey2* and *cmyb* at 36 hpf in embryos treated with clotrimazole and/or DBZ. (D) *her6* and *her9* expression at 36 hpf in embryos treated with clotrimazole and/or DBZ by qPCR. Error bar,  $\pm$ s. d. \* $p < 0.05$ , \*\* $p < 0.01$ .
