# Supplementary material for: G protein-coupled receptor 183 facilitates endothelial-to-hematopoietic transition via Notch1 inhibition
Source: PubMed Central journal article supplement — Cell Res. 2015 Sep 11;25(10):1093–107. doi: 10.1038/cr.2015.109 (PMC4650626; doi:10.1038/cr.2015.109), 2015-09-11
Supplement: cr2015109x8.pdf [file cr2015109x8.pdf]

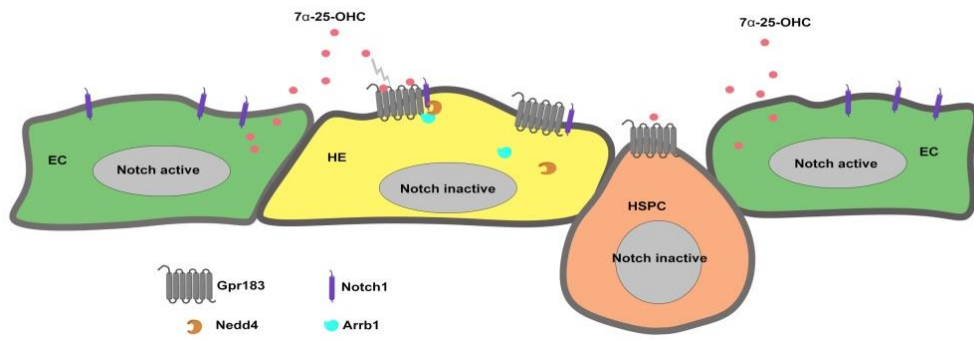

**Supplementary information, Figure S8** Working model of Gpr183 repressing Notch signaling to facilitate HSPCs emergence. Gpr183 recruits Arrb1 and Nedd4 to degrade Notch1 in HE to facilitate HSPC development.
