# Supplementary material for: G protein-coupled receptor 183 facilitates endothelial-to-hematopoietic transition via Notch1 inhibition
Source: PubMed Central journal article supplement — Cell Res. 2015 Sep 11;25(10):1093–107. doi: 10.1038/cr.2015.109 (PMC4650626; doi:10.1038/cr.2015.109), 2015-09-11
Supplement: cr2015109x12.pdf [file cr2015109x12.pdf]

**Supplementary information, Table S4** Morpholinos used in this work.

| Morpholinos          | Sequences (5'-3')         | Dosages (ng) |
|----------------------|---------------------------|--------------|
| <i>runx1</i> -atgMO  | AGCGCTCTTACCGTATTTGGCGTCC | 3.4          |
| <i>abcg2a</i> -atgMO | TCAGCTCCACTCTGGTGTCCGCCAT | 4.2          |
| <i>alad</i> -atgMO   | GTCATTGTGTTTGTGTTTAGTCACC | 4.2          |
| <i>gpr183</i> -atgMO | TGAAGTTTGCTGATGTTGTCTCCAT | 3.4          |
| <i>hdr</i> -atgMO    | GTCCAATCATTATCTCACTTTCTCC | 4.2          |
| <i>nfe2</i> -atgMO   | GTTCTGCCAGGCCAAGTCCATCTC  | 4.2          |
| <i>plxnd1</i> -atgMO | CACACACACTCACGTTGATGATGAG | 2.1          |
| <i>tbxbl</i> -atgMO  | CCGTTCTCTGGGAGATACATGTCC  | 3.0          |
| <i>arrb1</i> -atgMO  | ACACCCTTGTGCCTTTATCTCCCAT | 4.2          |
| <i>nedd4a</i> -atgMO | CGGGAGTTGCGCGGCCATGTTTCAT | 2.1          |
