# Supplementary material for: G protein-coupled receptor 183 facilitates endothelial-to-hematopoietic transition via Notch1 inhibition
Source: PubMed Central journal article supplement — Cell Res. 2015 Sep 11;25(10):1093–107. doi: 10.1038/cr.2015.109 (PMC4650626; doi:10.1038/cr.2015.109), 2015-09-11
Supplement: cr2015109x13.pdf [file cr2015109x13.pdf]

**Supplementary information, Table S5** The qPCR primers used in this work.

|                     |                              |
|---------------------|------------------------------|
| <i>ephrinB2a</i> F  | 5'-CAAGGACAGCAAATCGAATG-3'   |
| <i>ephrinB2a</i> R  | 5'-TGAGCCAATGACTGATGAGG-3'   |
| <i>runx1</i> F      | 5'-ACCGTCTTCACAAACCCTC-3'    |
| <i>runx1</i> R      | 5'-CCTGGCTTTACTGCTTCATC-3'   |
| <i>hey2</i> F       | 5'-ATTGATGTGGGCAGCGAGAA-3'   |
| <i>hey2</i> R       | 5'-TGGGATGTGGTGGATGTGGA-3'   |
| <i>her6</i> F       | 5'-CCAGTCTACGCAAACAATT-3'    |
| <i>her6</i> R       | 5'-AACGCTGAACAAAGAAAACAAG-3' |
| <i>her9</i> F       | 5'-CAGCCACGGACGGACAGTTT-3'   |
| <i>her9</i> R       | 5'-AACGCCCCGAGAAGGAGGTCA-3'  |
| <i>gpr183</i> F     | 5'-CTAGACCAGGAGGTGCCATTT-3'  |
| <i>gpr183</i> R     | 5'-CATTTCAGCAATCCAACG-3'     |
| <i>beta-actin</i> F | 5'-GCTGTTTTCCCTCCATTGTT-3'   |
| <i>beta-actin</i> R | 5'-TCCCATGCCAACCATCACT-3'    |
